# Supplementary material for: The possible role of visceral fat in early pregnancy as a predictor of gestational diabetes mellitus by regulating adipose-derived exosomes miRNA-148 family: protocol for a nested case-control study in a cohort study
Source: PubMed Central journal article supplement (PMC8011135; doi:10.1186/s12884-021-03737-1), 2021-03-30
Supplement: 12884_2021_3737_MOESM1_ESM.pdf [file 12884_2021_3737_MOESM1_ESM.pdf]

**Part one: Characteristics of population Sociology**

|          |                                                                                                                                                                                                                                                                                                                                                                                                                                                                                                                                                                                                                                           |
|----------|-------------------------------------------------------------------------------------------------------------------------------------------------------------------------------------------------------------------------------------------------------------------------------------------------------------------------------------------------------------------------------------------------------------------------------------------------------------------------------------------------------------------------------------------------------------------------------------------------------------------------------------------|
| <b>1</b> | <b>Level of education:</b> <input type="checkbox"/> 1. illiteracy <input type="checkbox"/> 2. primary school <input type="checkbox"/> 3. junior middle school<br>(technical school) <input type="checkbox"/> 4. high school (polytechnic school) <input type="checkbox"/> 5. undergraduate course<br>(junior college) <input type="checkbox"/> 6. Postgraduate and above                                                                                                                                                                                                                                                                  |
| <b>2</b> | <b>Present occupation (You can choose more than one):</b><br><input type="checkbox"/> 1.worker <input type="checkbox"/> 2. peasant <input type="checkbox"/> 3. Functionaries <input type="checkbox"/> 4. salesperson <input type="checkbox"/> 5. personnel in a<br>specific technical field <input type="checkbox"/> 6. student <input type="checkbox"/> 7. housewife <input type="checkbox"/> 8.Other_____                                                                                                                                                                                                                               |
| <b>3</b> | <b>Personal income:</b> monthly income <input type="checkbox"/> <input type="checkbox"/> <input type="checkbox"/> <input type="checkbox"/> <input type="checkbox"/> <input type="checkbox"/> RMB <b>or</b> annual income <input type="checkbox"/> <input type="checkbox"/> <input type="checkbox"/> <input type="checkbox"/> <input type="checkbox"/> <input type="checkbox"/> RMB<br><b>or</b> Household income <input type="checkbox"/> <input type="checkbox"/> <input type="checkbox"/> <input type="checkbox"/> <input type="checkbox"/> <input type="checkbox"/> RMB/year <b>and</b> family members <input type="checkbox"/> number |

**Part two: History of gestation**

|          |                                                                                                                                                                                                                                                                                                                                                                                                                                                                                                                                                                                                                                                                                                         |
|----------|---------------------------------------------------------------------------------------------------------------------------------------------------------------------------------------------------------------------------------------------------------------------------------------------------------------------------------------------------------------------------------------------------------------------------------------------------------------------------------------------------------------------------------------------------------------------------------------------------------------------------------------------------------------------------------------------------------|
| <b>4</b> | <b>Previous history of pregnancy and childbirth: Apart from this pregnancy, have you ever been pregnant before</b> <input type="checkbox"/> No <input type="checkbox"/> Yes: number of pregnancy <input type="checkbox"/> <input type="checkbox"/> , among them, <b>Abortion</b> (Number of spontaneous abortions <input type="checkbox"/> 、 Number of induced abortion <input type="checkbox"/> ); <b>Live Birth</b> (Number of full-term live births <input type="checkbox"/> 、Number of preterm births(Less than 37 gestational weeks) <input type="checkbox"/> ); <b>Number of stillbirths</b> <input type="checkbox"/> ; <b>Number of neonatal deaths within 7 days</b> <input type="checkbox"/> . |
| <b>5</b> | <b>Is previous pregnancy pregnant with a defective child? (such as congenital heart disease、cheilopalatognathus、 Down syndrome, etc.)</b><br><input type="checkbox"/> No <input type="checkbox"/> Yes, Disease type _____<br><b>Have you ever been bred fetal macrosomia? (Weight ≥ 4000g within 1 hour after birth)</b><br><input type="checkbox"/> No <input type="checkbox"/> Yes                                                                                                                                                                                                                                                                                                                    |

**Part three: Status of disease**

|          |                                                                                                                                                                                                                                                                                                                                                                                                                                                                                                                                                                                                                                                                                                                                                                                                                                                                                                                                                                                                                                                                                                                                                                                                                                                                                                                                        |
|----------|----------------------------------------------------------------------------------------------------------------------------------------------------------------------------------------------------------------------------------------------------------------------------------------------------------------------------------------------------------------------------------------------------------------------------------------------------------------------------------------------------------------------------------------------------------------------------------------------------------------------------------------------------------------------------------------------------------------------------------------------------------------------------------------------------------------------------------------------------------------------------------------------------------------------------------------------------------------------------------------------------------------------------------------------------------------------------------------------------------------------------------------------------------------------------------------------------------------------------------------------------------------------------------------------------------------------------------------|
| <b>6</b> | <b>Personal disease history</b><br>Do you have diabetes <input type="checkbox"/> 0.No <input type="checkbox"/> 1.Yes <input type="checkbox"/> 99. unclear<br>Type of diabetes: <input type="checkbox"/> 1. Type 1 diabetes <input type="checkbox"/> 2. Type 2 diabetes<br>Highest fasting blood glucose level: <input type="checkbox"/> <input type="checkbox"/> . <input type="checkbox"/> mmol/L<br>Highest postprandial blood glucose level: <input type="checkbox"/> <input type="checkbox"/> . <input type="checkbox"/> mmol/L<br>Date of diagnosis: _____<br>Diagnostic hospital: <input type="checkbox"/> 1. Provincial Hospital <input type="checkbox"/> 2. Municipal (District) hospital <input type="checkbox"/> 3. county hospital <input type="checkbox"/> 4.Other____ (village clinic, etc.)<br>therapeutic measure ( <b>You can choose more than one</b> ):<br><input type="checkbox"/> 1. Diet control <input type="checkbox"/> 2. sports <input type="checkbox"/> 3. Take hypoglycemic drugs <input type="checkbox"/> 4. Insulin injection <input type="checkbox"/> 5. Taking traditional Chinese Medicine <input type="checkbox"/> 6. No treatment<br>Did you have gestational diabetes in your previous pregnancy? <input type="checkbox"/> 0.No <input type="checkbox"/> 1.Yes <input type="checkbox"/> 99. unclear |
|----------|----------------------------------------------------------------------------------------------------------------------------------------------------------------------------------------------------------------------------------------------------------------------------------------------------------------------------------------------------------------------------------------------------------------------------------------------------------------------------------------------------------------------------------------------------------------------------------------------------------------------------------------------------------------------------------------------------------------------------------------------------------------------------------------------------------------------------------------------------------------------------------------------------------------------------------------------------------------------------------------------------------------------------------------------------------------------------------------------------------------------------------------------------------------------------------------------------------------------------------------------------------------------------------------------------------------------------------------|

Do you have high blood pressure?  0.No  1.Yes  99.unclear

The highest level of hypertension: systolic pressure  mmHg diastolic pressure  mmHg

Date of diagnosis: \_\_\_\_\_

Diagnostic hospital:  1. Provincial Hospital  2. Municipal (District) hospital  3. county hospital  4. Other \_\_\_\_ (village clinic, etc.)

Did you have gestational hypertension in your previous pregnancy?  0.No  1.Yes  99.unclear

Do you have any urogenital diseases?  0.No  1.Yes  99.unclear, Date of diagnosis: \_\_\_\_\_

Do you have polycystic ovary syndrome?  0.No  1.Yes  99.unclear, Date of diagnosis: \_\_\_\_\_

Do you have thyroid disease?  0.No  1.Yes  99.unclear, Date of diagnosis: \_\_\_\_\_

**Do you have any other diseases? (Heart disease, cancer, tuberculosis, asthma, etc)**

1. \_\_\_\_\_, Date of diagnosis: \_\_\_\_\_ 2. \_\_\_\_\_, Date of diagnosis: \_\_\_\_\_

3. \_\_\_\_\_, Date of diagnosis: \_\_\_\_\_ 4. \_\_\_\_\_, Date of diagnosis: \_\_\_\_\_

**7 Family history of disease (You can choose more than one)**

Who has diabetes in the family?  0.No  1.Yes  99.unclear

1.paternal-grandfather  2.paternal-grandmother  3. maternal-grandfather  4. maternal-grandmother

5.father  6.mother  7. brothers and sisters  8. sons and daughters

Who has hypertension in the family?  0.No  1.Yes  99.unclear

1.paternal-grandfather  2.paternal-grandmother  3.maternal-grandfather  4. maternal-grandmother

5. father  6. .mother  7. brothers and sisters  8. sons and daughters

Who has gestational diabetes in the family?  0.No  1.Yes  99.unclear

1. paternal-grandmother  2. maternal-grandmother  3.mother  4.sisters

Who has gestational hypertension in the family?  0.No  1.Yes  99.unclear

1. paternal-grandmother  2. maternal-grandmother  3. mother  4. sisters

Who has given birth to macrosomia in the family?  0.No  1.Yes  99.unclear

1. paternal-grandmother  2. maternal-grandmother  3. mother  4. sisters

**Part four: life style**

|                  |                          |                                  |                                                                 |                                    |                                                                 |
|------------------|--------------------------|----------------------------------|-----------------------------------------------------------------|------------------------------------|-----------------------------------------------------------------|
| <b>8 Smoking</b> |                          | <b>6 months before pregnancy</b> |                                                                 | <b>First 3 months of pregnancy</b> |                                                                 |
|                  | Do you smoke?            | <input type="checkbox"/> No      | <input type="checkbox"/> Yes (How many cigarettes a day? _____) | <input type="checkbox"/> No        | <input type="checkbox"/> Yes (How many cigarettes a day? _____) |
|                  | Does your husband smoke? | <input type="checkbox"/> No      | <input type="checkbox"/> Yes (How many cigarettes a day? _____) | <input type="checkbox"/> No        | <input type="checkbox"/> Yes (How many cigarettes a day? _____) |

|                                      |                             |                                                                 |                             |                                                                 |
|--------------------------------------|-----------------------------|-----------------------------------------------------------------|-----------------------------|-----------------------------------------------------------------|
| Are you exposed to secondhand smoke? | <input type="checkbox"/> No | <input type="checkbox"/> Yes (How many cigarettes a day? _____) | <input type="checkbox"/> No | <input type="checkbox"/> Yes (How many cigarettes a day? _____) |
|--------------------------------------|-----------------------------|-----------------------------------------------------------------|-----------------------------|-----------------------------------------------------------------|

|                                  |                                  |                                                                                                                         |                                    |                                                                                                                         |
|----------------------------------|----------------------------------|-------------------------------------------------------------------------------------------------------------------------|------------------------------------|-------------------------------------------------------------------------------------------------------------------------|
| <b>9 Drinking</b>                |                                  |                                                                                                                         |                                    |                                                                                                                         |
|                                  | <b>6 months before pregnancy</b> |                                                                                                                         | <b>First 3 months of pregnancy</b> |                                                                                                                         |
| Do you drink alcohol?            | <input type="checkbox"/> No      | <input type="checkbox"/> Yes (Do you drink white spirit, beer or red wine? How often? How much do you drink at a time?) | <input type="checkbox"/> No        | <input type="checkbox"/> Yes (Do you drink white spirit, beer or red wine? How often? How much do you drink at a time?) |
| Does your husband drink alcohol? | <input type="checkbox"/> No      | <input type="checkbox"/> Yes (Do you drink white spirit, beer or red wine? How often? How much do you drink at a time?) | <input type="checkbox"/> No        | <input type="checkbox"/> Yes (Do you drink white spirit, beer or red wine? How often? How much do you drink at a time?) |

How many meals do you have on average before pregnancy? 1. One meal a day 2. Two meals a day 3. Three meals a day 4. Four meals a day

How many meals do you have on average during pregnancy? 1. One meal a day 2. Two meals a day 3. Three meals a day 4. Four meals a day

How about your appetite before pregnancy? 1. Good 2. Just so so 3. Bad

How about your appetite during pregnancy? 1. Good 2. Just so so 3. Bad

Do you have a partial diet before pregnancy? 0. No 1. Eat less vegetables 2. Eat less meat

Do you have a partial diet during pregnancy? 0. No 1. Eat less vegetables 2. Eat less meat

Which flavor do you like before pregnancy? (You can choose more than one) 1. light 2. moderate 3. salty 4. sweet 5. spicy 6. sour

Which flavor do you like during pregnancy? (You can choose more than one) 1. light 2. moderate 3. salty 4. sweet 5. spicy 6. sour

What kind of cooking do you usually make before pregnancy? 1. water cooking 2. steam 3. stir-fry 4. deep frying 5. other \_\_\_\_\_

What kind of cooking do you usually make during pregnancy? 1. water cooking 2. steam 3. stir-fry 4. deep frying 5. other \_\_\_\_\_

What kind of oil do you usually eat before pregnancy? 1. peanut oil 2. soybean oil 3. rapeseed oil 4. olive oil 5. corn germ oil 6. blend oil 7. other \_\_\_\_\_

What kind of oil do you usually eat during pregnancy? 1. peanut oil 2. soybean oil 3. rapeseed oil 4. olive oil 5. corn germ oil 6. blend oil 7. other \_\_\_\_\_

What kind of drink do you eat most before pregnancy? 1. plain boiled water 2. green tea 3. black tea 4. cola 5. fruit juice 6. coffee 7. other \_\_\_\_\_

What kind of drink do you eat most during pregnancy? 1. plain boiled water 2. green tea 3. black tea 4. cola 5. fruit juice 6. coffee 7. other \_\_\_\_\_

What is your staple food before pregnancy? 1. steamed bread or rice 2. coarse food grain 3. tubers food 4. the three are basically equal

What is your staple food during pregnancy? 1. steamed bread or rice 2. coarse food grain 3. tubers food 4. the three are basically equal

What kind of food do you usually eat before pregnancy? (Sort by 1-3, 1 is the most common eaten food)

1.\_\_ 2.\_\_ 3.\_\_

- a) meat b) liver and kidney of animal c) seafood d)egg e)milk f)tofu g) vegetables, fruits h) mushroom  
i) sweet and soft drinks k) no special

What kind of food do you not often eat before pregnancy?( Sort by 1-3, 1 is the least commonly eaten food )

1.\_\_ 2.\_\_ 3.\_\_

- a) meat b) liver and kidney of animal c) seafood d)egg e)milk f)tofu g) vegetables, fruits h) mushroom  
i) sweet and soft drinks k) no special

What kind of food do you usually eat during pregnancy?(Sort by 1-3, 1 is the most common eaten food)

1.\_\_ 2.\_\_ 3.\_\_

- a) meat b) liver and kidney of animal c) seafood d)egg e)milk f)tofu g) vegetables, fruits h) mushroom  
i) sweet and soft drinks k) no special

What kind of food do you not often eat during pregnancy?( Sort by 1-3, 1 is the least commonly eaten food )

1.\_\_ 2.\_\_ 3.\_\_

- a) meat b) liver and kidney of animal c) seafood d)egg e)milk f)tofu g) vegetables, fruits h) mushroom  
i) sweet and soft drinks k) no special

Please recall whether you have eaten the following foods in the past year and estimate the frequency and average consumption of these foods

| Food names                                             | Times of eating                                           |                 |                  |                  |            |                 |                 | Average consumption |
|--------------------------------------------------------|-----------------------------------------------------------|-----------------|------------------|------------------|------------|-----------------|-----------------|---------------------|
|                                                        | Don't eat                                                 | < 1 time / week | 1-3 times / week | 4-6 times / week | Once a day | 2-3 times / day | ≥ 4 times / day |                     |
|                                                        | Please select the appropriate number of cycles to fill in |                 |                  |                  |            |                 |                 |                     |
| 1 Fruits (apple\banana, etc)                           |                                                           |                 |                  |                  |            |                 |                 | g                   |
| 2 Dark leafy vegetables ( spinach \rape\tomatoes, etc) |                                                           |                 |                  |                  |            |                 |                 | g                   |
| 3 Light vegetable ( Chinese cabbage\turnip, etc )      |                                                           |                 |                  |                  |            |                 |                 | g                   |
| 4 Mushroom                                             |                                                           |                 |                  |                  |            |                 |                 | g                   |
| 5 Salted products (pickles, etc)                       |                                                           |                 |                  |                  |            |                 |                 | g                   |
| 6 Freshwater fish (carp\grass carp, etc)               |                                                           |                 |                  |                  |            |                 |                 | g                   |
| 7 Marine fish (Spanish mackerel, etc)                  |                                                           |                 |                  |                  |            |                 |                 | g                   |
| 8 seafood ( shrimp, etc )                              |                                                           |                 |                  |                  |            |                 |                 | g                   |
| 9 poultry ( chicken, etc)                              |                                                           |                 |                  |                  |            |                 |                 | g                   |
| 10 meat ( pork\beef, etc)                              |                                                           |                 |                  |                  |            |                 |                 | g                   |
| 11 processed meat ( sausage, etc)                      |                                                           |                 |                  |                  |            |                 |                 | g                   |
| 12 nuts ( almond\walnut, etc )                         |                                                           |                 |                  |                  |            |                 |                 | g                   |
| 13 legume food (tofu, etc)                             |                                                           |                 |                  |                  |            |                 |                 | g or ml             |
| 14 dairy products(milk\yogurt, etc)                    |                                                           |                 |                  |                  |            |                 |                 | ml                  |
| 15 egg (egg roll, etc)                                 |                                                           |                 |                  |                  |            |                 |                 | g                   |
| 16 cereals (steamed bun\rice, etc)                     |                                                           |                 |                  |                  |            |                 |                 | g                   |

|                                    |  |  |  |  |  |  |  |  |    |
|------------------------------------|--|--|--|--|--|--|--|--|----|
| 17 tubers food (potato, etc)       |  |  |  |  |  |  |  |  | g  |
| 18 sweet food (bread\cake, etc)    |  |  |  |  |  |  |  |  | g  |
| 19 fried food (Fried chicken, etc) |  |  |  |  |  |  |  |  | ml |
| 20 soft drink (cola, etc)          |  |  |  |  |  |  |  |  | ml |
| 21 coffee                          |  |  |  |  |  |  |  |  | ml |
| 22 tea (black tea\green tea, etc)  |  |  |  |  |  |  |  |  | ml |
| 23 edible oil                      |  |  |  |  |  |  |  |  | ml |
| 24 salt                            |  |  |  |  |  |  |  |  | g  |
| 25 daily drinking water            |  |  |  |  |  |  |  |  | ml |

Please recall whether you have eaten the following foods since your pregnancy (early pregnancy) and estimate the frequency and average consumption of these foods

| Food names                                             | Times of eating                                           |                 |                  |                  |            |                 |                 | Average consumption |
|--------------------------------------------------------|-----------------------------------------------------------|-----------------|------------------|------------------|------------|-----------------|-----------------|---------------------|
|                                                        | Don't eat                                                 | < 1 time / week | 1-3 times / week | 4-6 times / week | Once a day | 2-3 times / day | ≥ 4 times / day |                     |
|                                                        | Please select the appropriate number of cycles to fill in |                 |                  |                  |            |                 |                 |                     |
| 1 Fruits (apple\banana, etc)                           |                                                           |                 |                  |                  |            |                 |                 | g                   |
| 2 Dark leafy vegetables ( spinach \rape\tomatoes, etc) |                                                           |                 |                  |                  |            |                 |                 | g                   |
| 3 Light vegetable ( Chinese cabbage\turnip, etc )      |                                                           |                 |                  |                  |            |                 |                 | g                   |
| 4 Mushroom                                             |                                                           |                 |                  |                  |            |                 |                 | g                   |
| 5 Salted products (pickles, etc)                       |                                                           |                 |                  |                  |            |                 |                 | g                   |
| 6 Freshwater fish (carp\grass carp, etc)               |                                                           |                 |                  |                  |            |                 |                 | g                   |
| 7 Marine fish (Spanish mackerel, etc)                  |                                                           |                 |                  |                  |            |                 |                 | g                   |
| 8 seafood ( shrimp, etc )                              |                                                           |                 |                  |                  |            |                 |                 | g                   |
| 9 poultry ( chicken, etc)                              |                                                           |                 |                  |                  |            |                 |                 | g                   |
| 10 meat ( pork\beef, etc)                              |                                                           |                 |                  |                  |            |                 |                 | g 或 ml              |
| 11 processed meat ( sausage, etc)                      |                                                           |                 |                  |                  |            |                 |                 | ml                  |
| 12 nuts ( almond\walnut, etc )                         |                                                           |                 |                  |                  |            |                 |                 | g                   |
| 13 legume food (tofu, etc)                             |                                                           |                 |                  |                  |            |                 |                 | g                   |
| 14 dairy products(milk\yogurt, etc)                    |                                                           |                 |                  |                  |            |                 |                 | g                   |
| 15 egg (egg roll, etc)                                 |                                                           |                 |                  |                  |            |                 |                 | g                   |
| 16 cereals (steamed bun\rice, etc)                     |                                                           |                 |                  |                  |            |                 |                 | ml                  |
| 17 tubers food (potato, etc)                           |                                                           |                 |                  |                  |            |                 |                 | ml                  |
| 18 sweet food (bread\cake, etc)                        |                                                           |                 |                  |                  |            |                 |                 | ml                  |
| 19 fried food (Fried chicken, etc)                     |                                                           |                 |                  |                  |            |                 |                 | ml                  |
| 20 soft drink (cola, etc)                              |                                                           |                 |                  |                  |            |                 |                 | g                   |
| 21 coffee                                              |                                                           |                 |                  |                  |            |                 |                 | ml                  |
| 22 tea (black tea\green tea, etc)                      |                                                           |                 |                  |                  |            |                 |                 | ml                  |

|                            |                             |                                                                                                                                                                                                                                                               |                                                                                                                                                                                                                                                             |  |  |  |  |  |    |
|----------------------------|-----------------------------|---------------------------------------------------------------------------------------------------------------------------------------------------------------------------------------------------------------------------------------------------------------|-------------------------------------------------------------------------------------------------------------------------------------------------------------------------------------------------------------------------------------------------------------|--|--|--|--|--|----|
| 23 edible oil              |                             |                                                                                                                                                                                                                                                               |                                                                                                                                                                                                                                                             |  |  |  |  |  | ml |
| 24 salt                    |                             |                                                                                                                                                                                                                                                               |                                                                                                                                                                                                                                                             |  |  |  |  |  | g  |
| 25 daily drinking water    |                             |                                                                                                                                                                                                                                                               |                                                                                                                                                                                                                                                             |  |  |  |  |  | ml |
| Folic acid                 | <input type="checkbox"/> No | <input type="checkbox"/> Oral administration 3 months before pregnancy <input type="checkbox"/> Oral administration during 3 months of pregnancy <input type="checkbox"/> Oral administration 3 months before pregnancy to the first 3 months after pregnancy | brand_____ duration (month) _____<br><input type="checkbox"/> Once a day <input type="checkbox"/> 2 times/day <input type="checkbox"/> 3 times/day<br><input type="checkbox"/> Once a week <input type="checkbox"/> >3 times / week<br>Dosage per time_____ |  |  |  |  |  |    |
| Iron                       | <input type="checkbox"/> No | <input type="checkbox"/> Oral administration 3 months before pregnancy <input type="checkbox"/> Oral administration during 3 months of pregnancy <input type="checkbox"/> Oral administration 3 months before pregnancy to the first 3 months after pregnancy | brand_____ duration (month) _____<br><input type="checkbox"/> Once a day <input type="checkbox"/> 2 times/day <input type="checkbox"/> 3 times/day<br><input type="checkbox"/> Once a week <input type="checkbox"/> >3 times / week<br>Dosage per time_____ |  |  |  |  |  |    |
| Calcium                    | <input type="checkbox"/> No | <input type="checkbox"/> Oral administration 3 months before pregnancy <input type="checkbox"/> Oral administration during 3 months of pregnancy <input type="checkbox"/> Oral administration 3 months before pregnancy to the first 3 months after pregnancy | brand_____ duration (month) _____<br><input type="checkbox"/> Once a day <input type="checkbox"/> 2 times/day <input type="checkbox"/> 3 times/day<br><input type="checkbox"/> Once a week <input type="checkbox"/> >3 times / week<br>Dosage per time_____ |  |  |  |  |  |    |
| Calcium magnesium mixture  | <input type="checkbox"/> No | <input type="checkbox"/> Oral administration 3 months before pregnancy <input type="checkbox"/> Oral administration during 3 months of pregnancy <input type="checkbox"/> Oral administration 3 months before pregnancy to the first 3 months after pregnancy | brand_____ duration (month) _____<br><input type="checkbox"/> Once a day <input type="checkbox"/> 2 times/day <input type="checkbox"/> 3 times/day<br><input type="checkbox"/> Once a week <input type="checkbox"/> >3 times / week<br>Dosage per time_____ |  |  |  |  |  |    |
| Compound vitamin           | <input type="checkbox"/> No | <input type="checkbox"/> Oral administration 3 months before pregnancy <input type="checkbox"/> Oral administration during 3 months of pregnancy <input type="checkbox"/> Oral administration 3 months before pregnancy to the first 3 months after pregnancy | brand_____ duration (month) _____<br><input type="checkbox"/> Once a day <input type="checkbox"/> 2 times/day <input type="checkbox"/> 3 times/day<br><input type="checkbox"/> Once a week <input type="checkbox"/> >3 times / week<br>Dosage per time_____ |  |  |  |  |  |    |
| Albumen powder             | <input type="checkbox"/> No | <input type="checkbox"/> Oral administration 3 months before pregnancy <input type="checkbox"/> Oral administration during 3 months of pregnancy <input type="checkbox"/> Oral administration 3 months before pregnancy to the first 3 months after pregnancy | brand_____ duration (month) _____<br><input type="checkbox"/> Once a day <input type="checkbox"/> 2 times/day <input type="checkbox"/> 3 times/day<br><input type="checkbox"/> Once a week <input type="checkbox"/> >3 times / week<br>Dosage per time_____ |  |  |  |  |  |    |
| Fish oil                   | <input type="checkbox"/> No | <input type="checkbox"/> Oral administration 3 months before pregnancy <input type="checkbox"/> Oral administration during 3 months of pregnancy <input type="checkbox"/> Oral administration 3 months before pregnancy to the first 3 months after pregnancy | brand_____ duration (month) _____<br><input type="checkbox"/> Once a day <input type="checkbox"/> 2 times/day <input type="checkbox"/> 3 times/day<br><input type="checkbox"/> Once a week <input type="checkbox"/> >3 times / week<br>Dosage per time_____ |  |  |  |  |  |    |
| Cod-liver oil              | <input type="checkbox"/> No | <input type="checkbox"/> Oral administration 3 months before pregnancy <input type="checkbox"/> Oral administration during 3 months of pregnancy <input type="checkbox"/> Oral administration 3 months before pregnancy to the first 3 months after pregnancy | brand_____ duration (month) _____<br><input type="checkbox"/> Once a day <input type="checkbox"/> 2 times/day <input type="checkbox"/> 3 times/day<br><input type="checkbox"/> Once a week <input type="checkbox"/> >3 times / week<br>Dosage per time_____ |  |  |  |  |  |    |
| Formula for pregnant women | <input type="checkbox"/> No | <input type="checkbox"/> Oral administration 3 months before pregnancy <input type="checkbox"/> Oral administration during 3 months of pregnancy <input type="checkbox"/> Oral administration 3 months before pregnancy to the first 3 months after pregnancy | brand_____ duration (month) _____<br><input type="checkbox"/> Once a day <input type="checkbox"/> 2 times/day <input type="checkbox"/> 3 times/day<br><input type="checkbox"/> Once a week <input type="checkbox"/> >3 times / week<br>Dosage per time_____ |  |  |  |  |  |    |

|                     |      |                             |                                                                                                                                                                                                                                                               |                                                                                                                                                                                                                                                               |
|---------------------|------|-----------------------------|---------------------------------------------------------------------------------------------------------------------------------------------------------------------------------------------------------------------------------------------------------------|---------------------------------------------------------------------------------------------------------------------------------------------------------------------------------------------------------------------------------------------------------------|
| Vitamin supplements | D    | <input type="checkbox"/> No | <input type="checkbox"/> Oral administration 3 months before pregnancy <input type="checkbox"/> Oral administration during 3 months of pregnancy <input type="checkbox"/> Oral administration 3 months before pregnancy to the first 3 months after pregnancy | brand _____ duration (month) _____<br><input type="checkbox"/> Once a day <input type="checkbox"/> 2 times/day <input type="checkbox"/> 3 times/day<br><input type="checkbox"/> Once a week <input type="checkbox"/> >3 times / week<br>Dosage per time _____ |
| DHA                 |      | <input type="checkbox"/> No | <input type="checkbox"/> Oral administration 3 months before pregnancy <input type="checkbox"/> Oral administration during 3 months of pregnancy <input type="checkbox"/> Oral administration 3 months before pregnancy to the first 3 months after pregnancy | brand _____ duration (month) _____<br><input type="checkbox"/> Once a day <input type="checkbox"/> 2 times/day <input type="checkbox"/> 3 times/day<br><input type="checkbox"/> Once a week <input type="checkbox"/> >3 times / week<br>Dosage per time _____ |
| Calcium powder      | milk | <input type="checkbox"/> No | <input type="checkbox"/> Oral administration 3 months before pregnancy <input type="checkbox"/> Oral administration during 3 months of pregnancy <input type="checkbox"/> Oral administration 3 months before pregnancy to the first 3 months after pregnancy | brand _____ duration (month) _____<br><input type="checkbox"/> Once a day <input type="checkbox"/> 2 times/day <input type="checkbox"/> 3 times/day<br><input type="checkbox"/> Once a week <input type="checkbox"/> >3 times / week<br>Dosage per time _____ |

### Part five Physical activity

#### Part one: day-to-day work

1. Are you currently working?

Yes

No(Skip to part 2: daily traffic)

2. In the past 7 days, how many days have you participated in moderate physical activities (such as lifting small items, cleaning, etc.) at work for more than 10 days minute? (Activities outside of work are not included)

\_\_\_\_\_ days / week

3. How long do you spend on moderate physical activity every day at work?

\_\_\_\_\_ hours / day

\_\_\_\_\_ minutes / day

4. In the past 7 days, how many days did you walk for more than 10 minutes? (note that walking time on the way to and from work is not included)

\_\_\_\_\_ days / week

No work-related moderate physical activity (Skip to part 2: daily traffic)

5. How long does it take to walk every day at work?

\_\_\_\_\_ hours / day

\_\_\_\_\_ minutes / day

#### Part two: daily traffic

6. In the past 7 days, how many days did you go out by car?

\_\_\_\_\_ days / week

Not going out by car (Skip to question 8)

7. How long does it take by car every day?

\_\_\_\_\_ hours / day

\_\_\_\_\_ minutes / day

8. In the past 7 days, how many days did you walk out for more than 10 minutes?

\_\_\_\_\_ days / week

Not walking out (Skip to part three)

9. How long did you it walk every day?

\_\_\_\_\_ hours / day

\_\_\_\_\_ minutes / day



Part three: daily life

10. In the past 7 days, how many days have you participated in heavy physical housework activities (such as carrying heavy objects, sweeping the floor, etc.) for more than 10 minutes? (excluding activities outside work)

\_\_\_\_\_ days / week

No work-related heavy physical activity (Skip to question 12)

11. How long do you spend on heavy housework every day?

\_\_\_\_\_ hours / day

\_\_\_\_\_ minutes / day

12. In the past 7 days, how many days have you participated in moderate physical housework activities (sweeping the floor, cleaning windows, etc.) for more than 10 minutes? (excluding activities outside work)

\_\_\_\_\_ days / week

No have moderate physical activity after work (Skip to the part four)

13. How long do you spend on moderate physical housework every day?

\_\_\_\_\_ hours / day

\_\_\_\_\_ minutes / day

Part four: Sports and recreation

14. In the past 7 days, how many days did you go out for a walk lasting more than 10 minutes? (The walking time described is not included)

\_\_\_\_\_ days / week

No going out for a walk (Skip to question 16)

15. How much time do you spend walking every day?

\_\_\_\_\_ hours / day

\_\_\_\_\_ minutes / day

16. How much time do you spend on bask in the sun every day?

\_\_\_\_\_ hours / day

\_\_\_\_\_ minutes / day

Part five: Sitting time

17. How much time did you spend sitting in your workday in the past 7 days?

\_\_\_\_\_ hours / day

\_\_\_\_\_ minutes / day

18. How much time did you spend sitting every day on weekends or rest days in the past 7 days?

\_\_\_\_\_ hours / day

\_\_\_\_\_ minutes / day

**Part six: physical examination**

|          |                                                                                                                                                                                                                                               |
|----------|-----------------------------------------------------------------------------------------------------------------------------------------------------------------------------------------------------------------------------------------------|
| <b>1</b> | <p><b>height:</b> □□□.□cm    <b>weight:</b> □□□.□Kg    <b>Pre-pregnancy weight:</b> □□□.□Kg</p> <p><b>waist circumference (cm):</b> 1.□□□.□    2. □□□.□    3. □□□.□</p> <p><b>hip circumference (cm):</b> 1.□□□.□    2. □□□.□    3. □□□.□</p> |
| <b>2</b> | <p><b>hospital sphygmomanometer to measure blood pressure</b></p> <p><b>(systolic blood pressure / diastolic blood pressure / heart rate):</b> 1. □□□ / □□□ / □□□</p>                                                                         |

|   |                                                                                                                                                                                                                                                                                                                                                                                                                                                                                                                                                                                                                                                                                                                                                                                                             |
|---|-------------------------------------------------------------------------------------------------------------------------------------------------------------------------------------------------------------------------------------------------------------------------------------------------------------------------------------------------------------------------------------------------------------------------------------------------------------------------------------------------------------------------------------------------------------------------------------------------------------------------------------------------------------------------------------------------------------------------------------------------------------------------------------------------------------|
|   | <p>project team sphygmomanometer to measure blood pressure: 1. <input type="text"/> <input type="text"/> <input type="text"/> / <input type="text"/> <input type="text"/> <input type="text"/> / <input type="text"/> <input type="text"/> <input type="text"/></p> <p>project team sphygmomanometer to measure blood pressure: 2. <input type="text"/> <input type="text"/> <input type="text"/> / <input type="text"/> <input type="text"/> <input type="text"/> / <input type="text"/> <input type="text"/> <input type="text"/></p> <p>project team sphygmomanometer to measure blood pressure: 3. <input type="text"/> <input type="text"/> <input type="text"/> / <input type="text"/> <input type="text"/> <input type="text"/> / <input type="text"/> <input type="text"/> <input type="text"/></p> |
| 3 | <p>abdominal subcutaneous fat thickness: <input type="text"/> <input type="text"/> <input type="text"/> . <input type="text"/> mm      visceral fat thickness: <input type="text"/> <input type="text"/> <input type="text"/> . <input type="text"/> mm</p> <p>Signature of doctor: _____</p>                                                                                                                                                                                                                                                                                                                                                                                                                                                                                                               |
